# Supplementary material for: Polymorphisms in C-Reactive Protein and Glypican-5 Are Associated with Lung Cancer Risk and Gartrokine-1 Influences Cisplatin-Based Chemotherapy Response in a Chinese Han Population
Source: PubMed Central journal article supplement (PMC4426656; doi:10.1155/2015/824304), 2015-04-27
Supplement: 824304.f1.pdf [file 824304.f1.pdf]

Table S1. Genotype profiles in the study

| SNP ID    | A<br>Minor allele | B<br>Major allele | Lung cancer |        |        | Control |        |        |
|-----------|-------------------|-------------------|-------------|--------|--------|---------|--------|--------|
|           |                   |                   | AA-FRE      | AB-FRE | BB-FRE | AA-FRE  | AB-FRE | BB-FRE |
| rs2808630 | C                 | T                 | 7           | 64     | 218    | 10      | 90     | 188    |
| rs1926203 | T                 | G                 | 11          | 81     | 217    | 7       | 79     | 223    |
| rs2352028 | T                 | C                 | 12          | 98     | 198    | 11      | 117    | 181    |
| rs8034191 | C                 | T                 | 0           | 21     | 288    | 0       | 20     | 289    |
| rs9635542 | G                 | A                 | 65          | 156    | 88     | 61      | 148    | 100    |
| rs4254535 | C                 | T                 | 12          | 102    | 195    | 10      | 114    | 185    |
| rs1530057 | A                 | C                 | 1           | 38     | 270    | 1       | 46     | 261    |
